# Supplementary material
Source: HighWire-hosted journal article supplement (https://jnm.snmjournals.org/highwire/filestream/94065/field_highwire_adjunct_files/0/Supplemental_Figures.pdf)
Supplement: Supplemental_Figures.pdf [file Supplemental_Figures.pdf]

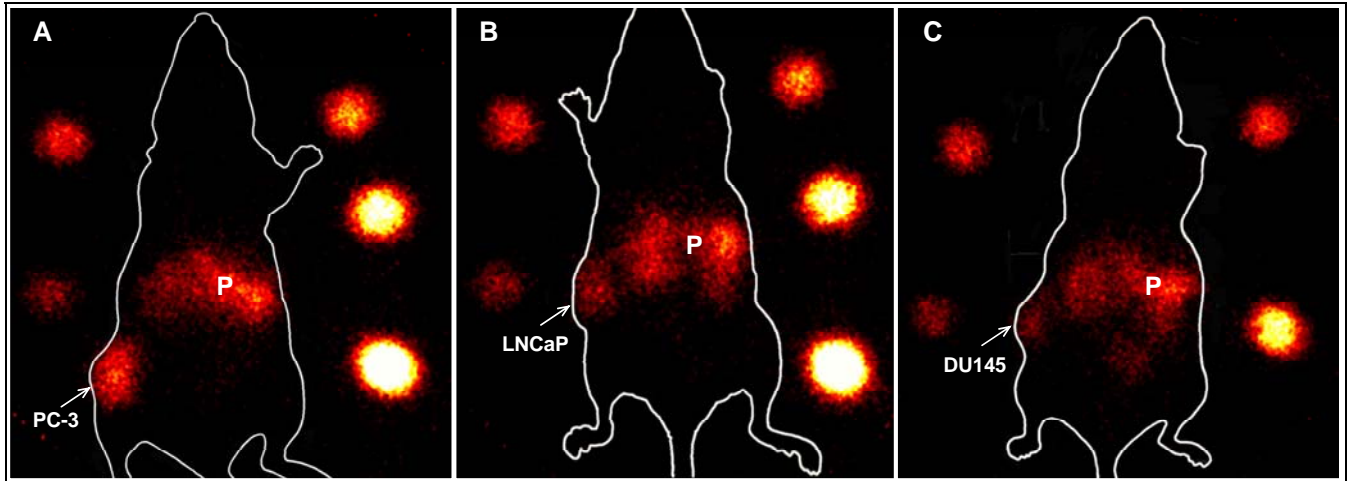

**SUPPLEMENTAL FIGURE 1.** Planar Gamma Images of Foxn1<sup>nu/nu</sup> mice bearing PC-3 (A), LNCaP (B), and DU145 (C) tumors. Images were acquired 24 h after tail vein injection with <sup>177</sup>Lu-AMBA ( 27.75 MBq). Arrows indicate tumor location; P = pancreas. Standards for PC-3 and LNCaP were (clockwise from lower left): 0.2, 0.5, 1, 2, and 4% of the injected dose. DU145 standards were 0.2, 0.5, 1, and 2% of the injected dose.

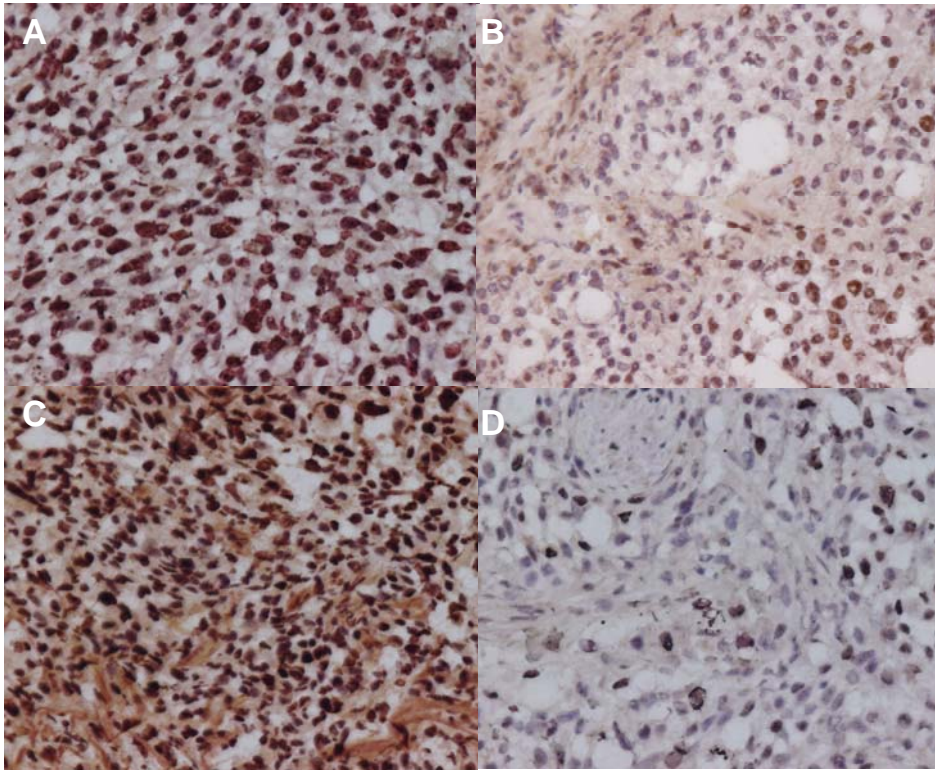

**SUPPLEMENTAL FIGURE 2.** Ki67 immunohistochemical staining (400X) revealed greater proliferation in Control (A; Study Day 60) over Treated (B; Study Day 60) LNCaP tumors. This change in proliferation rate was also seen in the DU145 Control (C; Study Day 48) over Treated (D; Study Day 26).
